# Supplementary material for: Targeting the B1 Gene and Analysis of Its Polymorphism Associated with Awned/Awnless Trait in Russian Germplasm Collections of Common Wheat
Source: MDPI journal article supplement (doi:10.3390/plants10112285), 2021-10-25
Supplement: s1 [file s1]

**Table S2.** Phenotyping and genotyping by markers to B1/b1 alleles of winter wheat accessions of Russian wheat germplasm collection of VIR

| n/n | VIR catalog number | Sample name             | *Subspecies                  | Origin                          | PCR test dominant allele (B1for/Znfrev) - recessive allele (b1for/Znfrev) | phenotype, Orel region |
|-----|--------------------|-------------------------|------------------------------|---------------------------------|---------------------------------------------------------------------------|------------------------|
| 1   | 4784               | Banatka                 | <b>**erythrospermum</b>      | Russia, Stavropol region        | <b>b1</b>                                                                 | <b>awned</b>           |
| 2   | 4832               | -                       | <b>erythrospermum</b>        | Russia, Kalmykia                | <b>b1mite</b>                                                             | <b>awned</b>           |
| 3   | 9723               | Beloturka bezostaya     | albidum                      | Russia, Yaroslavl' region       | <i>B1</i>                                                                 | awnless                |
| 4   | 9765               | Local                   | milturum                     | Russia, Pskov region            | <i>B1</i>                                                                 | awnless                |
| 5   | 9789               | Batishchevskaya         | lutescens                    | Russia, Smolensk region         | <i>B1</i>                                                                 | awnless                |
| 6   | 10213              | Gorkonkur               | <b>ferrugineum</b>           | Russia, Kursk region            | <b>b1mite</b>                                                             | <b>awned</b>           |
| 7   | 10376              | Kosobryukhovka          | -                            | Russia, Krasnodar region        | <b>b1mite</b>                                                             | <b>awned</b>           |
| 8   | 10890              | Donka                   | <b>ferrugineum</b>           | Russia, Rostov region           | <b>b1mite</b>                                                             | <b>awned</b>           |
| 9   | 10896              | Veshkinskaya            | <b>ferrugineum</b>           | Russia, Moscow region           | <b>b1mite</b>                                                             | <b>awned</b>           |
| 10  | 13092              | -                       | milturum                     | Russia, Primorsky krai          | <i>B1</i>                                                                 | awnless                |
| 11  | 22418              | Sandomirka              | albidum                      | Russia, Orel region             | <i>B1</i>                                                                 | awnless                |
| 12  | 24500              | Mikhaylovka             | <b>erythrospermum</b>        | Russia, Leningrad region        | <b>b1</b>                                                                 | <b>awned</b>           |
| 13  | 33053              | -                       | <b>erythrospermum</b>        | Russia, Khabarovsk krai         | <b>b1mite</b>                                                             | <b>awned</b>           |
| 14  | 34886              | Staritsinskaya          | <b>erythrospermum</b>        | Russia, Tomsk region            | <b>b1</b>                                                                 | <b>awned</b>           |
| 15  | 35698              | Batetskaya belokoloska  | albidum                      | Russia, Novgorod region         | <i>B1</i>                                                                 | awnless                |
| 16  | 35757              | Pashinskaya             | milturum                     | Russia, Kirov region            | <i>B1</i>                                                                 | awnless                |
| 17  | 35766              | Bogorodskaya            | <b>ferrugineum</b>           | Russia, Nizhniy Novgorod region | <b>b1mite</b>                                                             | <b>awned</b>           |
| 18  | 36454              | Plyusskaya              | albidum, lutescens, milturum | Russia, Pskov region            | <i>B1</i>                                                                 | awnless                |
| 19  | 36507              | Mestnaya                | lutescens                    | Russia, Chuvashia               | <i>B1</i>                                                                 | awnless                |
| 20  | 36526              | Eritrospermum 59        | <b>erythrospermum</b>        | Russia, Kursk region            | <b>b1mite</b>                                                             | <b>awned</b>           |
| 21  | 36590              | Skala                   | lutescens                    | Russia, Irkutsk region          | <i>B1</i>                                                                 | awnless                |
| 22  | 36612              | Velizhanskaya           | milturum                     | Russia, Tyumen' region          | <i>B1</i>                                                                 | awnless                |
| 23  | 37478              | Shatilovskaya           | <b>erythrospermum</b>        | Russia, Altai region            | <b>b1mite</b>                                                             | <b>awned</b>           |
| 24  | 38248              | Ust'-Ishimka            | lutescens                    | Russia, Omsk region             | <i>B1</i>                                                                 | awnless                |
| 25  | 38321              | Ustyuzhenskaya          | albidum                      | Russia, Vologda region          | <i>B1</i>                                                                 | awnless                |
| 26  | 38342              | Mestnaya maslyaninskaya | <b>erythrospermum</b>        | Russia, Novosibirsk region      | <b>b1mite</b>                                                             | <b>awned</b>           |
| 27  | 38435              | Sumarokovskaya mestnaya | milturum                     | Russia, Kostroma region         | <i>B1</i>                                                                 | awnless                |
| 28  | 38438              | Oyashinskaya            | <b>ferrugineum</b>           | Russia, Novosibirsk region      | <b>b1mite</b>                                                             | <b>awned</b>           |
| 29  | 40579              | Karel'skaya bezostaya   | velutinum                    | Russia, Karelia                 | <i>B1</i>                                                                 | awnless                |
| 30  | 42790              | Bezostaya 1             | lutescens                    | Russia, Krasnodar region        | <i>B1</i>                                                                 | awnless                |
| 31  | 43920              | Mironovskaya 808        | lutescens                    | USSR, Ukrainian SSR             | <i>B1</i>                                                                 | awnless                |
| 32  | 62733              | Inna                    | lutescens                    | Russia, Moscow region           | <i>B1</i>                                                                 | awnless                |
| 33  | 45654              | Kavkaz                  | lutescens                    | Russia, Krasnodar region        | <i>B1</i>                                                                 | awnless                |
| 34  | 49271              | Arthur 71               | lutescens                    | USA                             | <i>B1</i>                                                                 | awnless                |
| 35  | 62735              | Don 93                  | lutescens                    | Russia, Rostov region           | <i>B1</i>                                                                 | awnless                |
| 36  | 51829              | Oasis                   | lutescens                    | USA                             | <i>B1</i>                                                                 | awnless                |
| 37  | 54646              | Donskaya bezostaya      | lutescens                    | Russia, Rostov region           | <i>B1</i>                                                                 | awnless                |
| 38  | 55798              | Ul'yanovka 9            | lutescens                    | Russia, Kursk region            | <i>B1</i>                                                                 | awnless                |
| 39  | 55801              | Lyutestsens 12          | lutescens                    | Russia, Kursk region            | <i>B1</i>                                                                 | awnless                |
| 40  | 56058              | Sibiryachka             | lutescens                    | Russia, Novosibirsk region      | <i>B1</i>                                                                 | awnless                |
| 41  | 57687              | Voronezhskaya 174       | lutescens                    | Russia, Voronezh region         | <i>B1</i>                                                                 | awnless                |

|    |       |                           |                       |                          |                  |              |
|----|-------|---------------------------|-----------------------|--------------------------|------------------|--------------|
| 42 | 58137 | Kosack                    | lutescens             | Sweden                   | <i>B1</i>        | awnless      |
| 43 | 58676 | Stavropol'skaya kormovaya | lutescens             | Russia, Stavropol region | <i>B1</i>        | awnless      |
| 44 | 58802 | Labinka                   | <b>erythrospermum</b> | Russia, Krasnodar region | <b><i>b1</i></b> | <b>awned</b> |
| 45 | 60705 | Prikumskaya 986           | lutescens             | Russia, Stavropol region | <i>B1</i>        | awnless      |
| 46 | 61531 | Omskaya ozimaya           | lutescens             | Russia, Omsk region      | <i>B1</i>        | awnless      |
| 47 | 61548 | Sibirskaya Niva           | lutescens             | Russia, Omsk region      | <i>B1</i>        | awnless      |
| 48 | 61610 | TAM 200                   | <b>erythrospermum</b> | USA                      | <b><i>b1</i></b> | <b>awned</b> |
| 49 | 61966 | Bezenchukskaya 380        | lutescens             | Russia, Samara region    | <i>B1</i>        | awnless      |
| 50 | 61992 | Eritrospermum 31          | <b>erythrospermum</b> | Russia, Orenburg region  | <b><i>b1</i></b> | <b>awned</b> |
| 51 | 62019 | Fundulea 4                | <b>erythrospermum</b> | Romania                  | <b><i>b1</i></b> | <b>awned</b> |
| 52 | 62372 | Karl                      | <b>erythrospermum</b> | USA                      | <b><i>b1</i></b> | <b>awned</b> |
| 53 | 62399 | Century                   | <b>erythrospermum</b> | USA                      | <b><i>b1</i></b> | <b>awned</b> |
| 54 | 62432 | Kazanskaya 285            | <b>erythrospermum</b> | Russia, Tatarstan        | <b><i>b1</i></b> | <b>awned</b> |
| 55 | 62452 | Thunderbird               | <b>erythrospermum</b> | USA                      | <b><i>b1</i></b> | <b>awned</b> |
| 56 | 62509 | Tundza                    | lutescens             | Bulgaria                 | <i>B1</i>        | awnless      |
| 57 | 62703 | Norkan                    | <b>erythrospermum</b> | USA                      | <b><i>b1</i></b> | <b>awned</b> |
| 58 | 62707 | Abilene                   | <b>erythrospermum</b> | USA                      | <b><i>b1</i></b> | <b>awned</b> |
| 59 | 62711 | Victory                   | <b>erythrospermum</b> | USA                      | <b><i>b1</i></b> | <b>awned</b> |
| 60 | 44132 | Ramonskaya 42             | <b>ferrugineum</b>    | Russia, Voronezh region  | <b><i>b1</i></b> | <b>awned</b> |
| 61 | 49880 | Voronezhskaya 34          | <b>hostianum</b>      | Russia, Voronezh region  | <b><i>b1</i></b> | <b>awned</b> |
| 62 | 62738 | Zernogradka 9             | lutescens             | Russia, Rostov region    | <i>B1</i>        | awnless      |
| 63 | 62744 | Peacock                   | lutescens             | Great Britain            | <i>B1</i>        | awnless      |
| 64 | 63001 | Suzdal'skaya 2            | lutescens             | Russia, Vladimir region  | <i>B1</i>        | awnless      |
| 65 | 63002 | Tau                       | lutescens             | Russia, Vladimir region  | <i>B1</i>        | awnless      |
| 66 | 63006 | Tjelvar                   | lutescens             | Sweden                   | <i>B1</i>        | awnless      |
| 67 | 63037 | Tarasovskaya ostistaya    | <b>erythrospermum</b> | Russia, Rostov region    | <b><i>b1</i></b> | <b>awned</b> |
| 68 | 63040 | Zimorodok                 | lutescens             | Russia, Krasnodar region | <i>B1</i>        | awnless      |
| 69 | 63104 | Orenburgskaya 12          | velutinum             | Russia, Orenburg region  | <i>B1</i>        | awnless      |
| 70 | 63106 | Guberniya                 | lutescens             | Russia, Saratov region   | <i>B1</i>        | awnless      |
| 71 | 63117 | Splav                     | lutescens             | Russia, Vladimir region  | <i>B1</i>        | awnless      |
| 72 | 63119 | Zalarinka                 | lutescens             | Russia, Irkutsk region   | <i>B1</i>        | awnless      |
| 73 | 63368 | Yasen                     | <b>erythrospermum</b> | Bulgaria                 | <b><i>b1</i></b> | <b>awned</b> |
| 74 | 63523 | Vista                     | <b>erythrospermum</b> | USA                      | <b><i>b1</i></b> | <b>awned</b> |
| 75 | 63565 | Kazanskaya 560            | <b>erythrospermum</b> | Russia, Tatarstan        | <b><i>b1</i></b> | <b>awned</b> |
| 76 | 63894 | Mona                      | lutescens             | Czech Republic           | <i>B1</i>        | awnless      |
| 77 | 63897 | Encore                    | lutescens             | Great Britain            | <i>B1</i>        | awnless      |
| 78 | 63905 | Bruden=Bryden             | lutescens             | Great Britain            | <i>B1</i>        | awnless      |
| 79 | 63922 | Zodiac                    | lutescens             | Great Britain            | <i>B1</i>        | awnless      |
| 80 | 63981 | Turda 81-77               | lutescens             | Romania                  | <i>B1</i>        | awnless      |
| 81 | 64008 | Gorbi                     | lutescens             | Germany                  | <i>B1</i>        | awnless      |
| 82 | 64024 | Carolus                   | lutescens             | Germany                  | <i>B1</i>        | awnless      |
| 83 | 64033 | Arber                     | lutescens             | Germany                  | <i>B1</i>        | awnless      |
| 84 | 64049 | Rawhide                   | <b>erythrospermum</b> | USA                      | <b><i>b1</i></b> | <b>awned</b> |
| 85 | 64058 | Zlatostrui                | <b>graecum</b>        | Bulgaria                 | <b><i>b1</i></b> | <b>awned</b> |
| 86 | 64066 | Vida                      | lutescens             | Bulgaria                 | <i>B1</i>        | awnless      |
| 87 | 64160 | Moskovskaya 39            | <b>erythrospermum</b> | Russia, Moscow region    | <b><i>b1</i></b> | <b>awned</b> |
| 88 | 64161 | Galina                    | <b>erythrospermum</b> | Russia, Moscow region    | <b><i>b1</i></b> | <b>awned</b> |
| 89 | 64182 | Mv.Madrigal               | lutescens             | Hungary                  | <i>B1</i>        | awnless      |

|     |       |                         |                              |                            |                  |              |
|-----|-------|-------------------------|------------------------------|----------------------------|------------------|--------------|
| 90  | 64183 | Mv.Magdalena            | <b>erythrospermum</b>        | Hungary                    | <b><i>bl</i></b> | <b>awned</b> |
| 91  | 64184 | Mv.Sigma                | lutescens                    | Hungary                    | <i>Bl</i>        | awnless      |
| 92  | 64186 | Rapid                   | <b>erythrospermum</b>        | Romania                    | <b><i>bl</i></b> | <b>awned</b> |
| 93  | 64187 | Dropia                  | <b>erythrospermum</b>        | Romania                    | <b><i>bl</i></b> | <b>awned</b> |
| 94  | 64188 | Ariesan                 | <b>ferrugineum</b>           | Romania                    | <b><i>bl</i></b> | <b>awned</b> |
| 95  | 64192 | Alex                    | <b>erythrospermum</b>        | Romania                    | <b><i>bl</i></b> | <b>awned</b> |
| 96  | 64198 | Mera                    | lutescens                    | Russia, Vladimir region    | <i>Bl</i>        | awnless      |
| 97  | 64280 | Biryuza                 | lutescens                    | Russia, Samara region      | <i>Bl</i>        | awnless      |
| 98  | 64350 | Bat'ko                  | lutescens                    | Russia, Krasnodar region   | <i>Bl</i>        | awnless      |
| 99  | 64521 | Autan                   | <b>erythrospermum</b>        | France                     | <b><i>bl</i></b> | <b>awned</b> |
| 100 | 64522 | Brando                  | lutescens                    | France                     | <i>Bl</i>        | awnless      |
| 101 | 64523 | Caphorn                 | lutescens                    | France                     | <i>Bl</i>        | awnless      |
| 102 | 64525 | Forban                  | lutescence                   | France                     | <i>Bl</i>        | awnless      |
| 103 | 64526 | Hamac                   | lutescens                    | France                     | <i>Bl</i>        | awnless      |
| 104 | 64527 | Isengrain               | <b>erythrospermum</b>        | France                     | <b><i>bl</i></b> | <b>awned</b> |
| 105 | 64535 | Vulcain                 | lutescens                    | France                     | <i>Bl</i>        | awnless      |
| 106 | 64620 | Dominanta               | <b>erythrospermum</b>        | Russia, Rostov region      | <b><i>bl</i></b> | <b>awned</b> |
| 107 | 64632 | Volzhskaya S3           | <b>erythrospermum</b>        | Russia, Ul'yanovsk region  | <b><i>bl</i></b> | <b>awned</b> |
| 108 | 64747 | Novosibirskaya 51       | lutescens                    | Russia, Novosibirsk region | <i>Bl</i>        | awnless      |
| 109 | 64749 | Novosibirskaya 9        | lutescens                    | Russia, Novosibirsk region | <i>Bl</i>        | awnless      |
| 110 | 64909 | Zhemchuzhina Povolzh'ya | lutescens                    | Russia, Saratov region     | <i>Bl</i>        | awnless      |
| 111 | 64934 | Superior                | albidum                      | Canada                     | <i>Bl</i>        | awnless      |
| 112 | 64936 | AC Tempest              | <b>ferrugineum</b>           | Canada                     | <b><i>bl</i></b> | <b>awned</b> |
| 113 | 65027 | Karat                   | lutescens                    | Bulgaria                   | <i>Bl</i>        | awnless      |
| 114 | 65035 | Mv.Koma                 | <b>graecum</b>               | Hungary                    | <i>NA</i>        | <b>awned</b> |
| 115 | 65068 | Siluet                  | <b>compositumferrugineum</b> | Russia, Volgograd region   | <i>NA</i>        | <b>awned</b> |
| 116 | 65069 | Status                  | compositummltutum            | Russia, Volgograd region   | <i>Bl</i>        | awnless      |
| 117 | 65174 | Webster                 | lutescens                    | Canada                     | <i>Bl</i>        | awnless      |
| 118 | 65175 | Wisdom                  | lutescens                    | Canada                     | <i>Bl</i>        | awnless      |
| 119 | 65192 | L'govskaya 4            | lutescens                    | Russia, Kursk region       | <i>Bl</i>        | awnless      |
| 120 | 65207 | Ermak                   | <b>erythrospermum</b>        | Russia, Rostov region      | <b><i>bl</i></b> | <b>awned</b> |
| 121 | 65216 | Berezit                 | lutescens                    | Russia, Stavropol region   | <i>Bl</i>        | awnless      |
| 122 | 65217 | Kseniay                 | <b>erythrospermum</b>        | Russia, Stavropol region   | <b><i>bl</i></b> | <b>awned</b> |
| 123 | 65233 | Donstar                 | lutescens                    | Russia, Rostov region      | <i>Bl</i>        | awnless      |
| 124 | 65292 | GK Margit               | lutescens                    | Hungary                    | <i>Bl</i>        | awnless      |
| 125 | 65331 | FT Wonder               | <b>erythrospermum</b>        | Canada                     | <b><i>bl</i></b> | <b>awned</b> |
| 126 | 65375 | Don 105                 | lutescens                    | Russia, Rostov region      | <i>Bl</i>        | awnless      |
| 127 | 65397 | Intrada                 | <b>graecum</b>               | USA                        | <b><i>bl</i></b> | <b>awned</b> |
| 128 | 65405 | Amigo                   | <b>erythrospermum</b>        | USA                        | <b><i>bl</i></b> | <b>awned</b> |
| 129 | 65406 | Regina                  | lutescens                    | Czech Republic             | <i>Bl</i>        | awnless      |
| 130 | 65407 | Senta                   | lutescens                    | Czech Republic             | <i>Bl</i>        | awnless      |
| 131 | 65408 | Zdar                    | lutescens                    | Czech Republic             | <i>Bl</i>        | awnless      |
| 132 | 65409 | Boka                    | lutescens                    | Czech Republic             | <i>Bl</i>        | awnless      |
| 133 | 65610 | Dzhangal                | albidum                      | Russia, Saratov region     | <i>Bl</i>        | awnless      |
| 134 | 65613 | Kalach 60               | lutescens                    | Russia, Saratov region     | <i>Bl</i>        | awnless      |
| 135 | 65619 | Sakwa                   | lutescens                    | Poland                     | <i>Bl</i>        | awnless      |
| 136 | 65632 | Nutka                   | lutescens                    | Poland                     | <i>Bl</i>        | awnless      |
| 137 | 65635 | Turnia                  | lutescens                    | Poland                     | <i>Bl</i>        | awnless      |

|     |       |                   |                       |                          |                  |              |
|-----|-------|-------------------|-----------------------|--------------------------|------------------|--------------|
| 138 | 65638 | Certo             | lutescens             | Germany                  | <i>B1</i>        | awnless      |
| 139 | 65672 | Firuza 40         | <b>erythrospermum</b> | Russia, Stavropol region | <b><i>b1</i></b> | <b>awned</b> |
| 140 | 65756 | Nemchinovskaya 17 | <b>erythrospermum</b> | Russia, Moscow region    | <b><i>b1</i></b> | <b>awned</b> |
| 141 | 65923 | Bona Dea          | lutescens             | Slovakia                 | <i>B1</i>        | awnless      |
| 142 | 65927 | Malvina           | lutescens             | Slovakia                 | <i>B1</i>        | awnless      |
| 143 | 65928 | Malyska           | lutescens             | Slovakia                 | <i>B1</i>        | awnless      |
| 144 | 65929 | Markola           | lutescens             | Slovakia                 | <i>B1</i>        | awnless      |
| 145 | 65935 | Verita            | lutescens             | Slovakia                 | <i>B1</i>        | awnless      |
| 146 | 66053 | Kristy            | lutescens             | Canada                   | <i>B1</i>        | awnless      |
| 147 | 66054 | AC Buteo          | <b>erythrospermum</b> | Canada                   | <b><i>b1</i></b> | <b>awned</b> |
| 148 | 66306 | Kamyshanka 4      | lutescens             | Russia, Volgograd region | <i>B1</i>        | awnless      |
| 149 | 66308 | Torrild           | lutescens             | Germany                  | <i>B1</i>        | awnless      |
| 150 | 66309 | Omskaya 5         | lutescens             | Russia, Omsk region      | <i>B1</i>        | awnless      |
| 151 | 66321 | Kobra             | lutescens             | Poland                   | <i>B1</i>        | awnless      |
| 152 | 66322 | Soraja            | lutescens             | Poland                   | <i>B1</i>        | awnless      |
| 153 | 66323 | Bogatka           | lutescens             | Poland                   | <i>B1</i>        | awnless      |
| 154 | 66325 | Muza              | lutescens             | Poland                   | <i>B1</i>        | awnless      |
| 155 | 66332 | Lidiya            | <b>erythrospermum</b> | Russia, Rostov region    | <b><i>b1</i></b> | <b>awned</b> |
| 156 | 66336 | Kolos Orenbuzhiya | lutescens             | Russia, Orenburg region  | <i>B1</i>        | awnless      |
| 157 | 66337 | Pionerskaya 32    | <b>erythrospermum</b> | Russia, Orenburg region  | <b><i>b1</i></b> | <b>awned</b> |
| 158 | 66341 | Bazalt 2          | lutescens             | Russia, Voronezh region  | <i>B1</i>        | awnless      |
| 159 | 66504 | Bazis             | <b>erythrospermum</b> | Russia, Samara region    | <b><i>b1</i></b> | <b>awned</b> |
| 160 | 66626 | Priirtyshskaya    | lutescens             | Russia, Omsk region      | <i>B1</i>        | awnless      |
| 161 | 66628 | Elanskaya         | <b>erythrospermum</b> | Russia, Volgograd region | <b><i>b1</i></b> | <b>awned</b> |
| 162 | 66805 | Bezostaya 100     | lutescens             | Russia, Krasnodar region | <i>B1</i>        | awnless      |
| 163 | 66816 | Caravan           | lutescens             | Russia, Krasnodar region | <i>B1</i>        | awnless      |
| 164 | 66827 | Hamlet            | lutescens             | Germany                  | <i>B1</i>        | awnless      |
| 165 | 66842 | Hamdan            | lutescens             | Russia, Kalmykia         | <i>B1</i>        | awnless      |
| 166 | 66843 | Sarul             | lutescens             | Russia, Kalmykia         | <i>B1</i>        | awnless      |
| 167 | 66883 | Riphey            | <b>erythrospermum</b> | Russia, Orenburg region  | <b><i>b1</i></b> | <b>awned</b> |
| 168 | 67211 | Darina            | <b>erythrospermum</b> | Russia, Tatarstan        | <b><i>b1</i></b> | <b>awned</b> |
| 169 | 67213 | Nadezhda          | lutescens             | Russia, Tatarstan        | <i>B1</i>        | awnless      |

\* Zuev E.V., Amri A., Brykova A.N., Pyukkenen V.P., Mitrofanova O.P. Atlas of bread wheat (*Triticum aestivum* L.) genetic diversity based on spike and kernel characters. Supervising editor N.P. Goncharov. VIR, ICARDA. – 2nd edition. St. Petersburg, 2019. 132 p.

\*\* awned varieties are highlighted in bold
