# Supplementary material for: Targeting the B1 Gene and Analysis of Its Polymorphism Associated with Awned/Awnless Trait in Russian Germplasm Collections of Common Wheat
Source: MDPI journal article supplement (doi:10.3390/plants10112285), 2021-10-25
Supplement: s1 [file s1]

**Table S3** Determined *B1*- genotypes of awnless plants of *T. aestivum* from the F2 population obtained by crossing Lubava 5 (awned) x 476-10 line (awnless). 1039-1062- numbers indicate F1 plants. Homozygous *B1B1* genotypes are in bold.

| Numbers of F2 plants | PCR results<br>B1for/Znfrev //<br>b1for/Znfrev | Genotype    | F3 population,<br>segregation into awned<br>and awnless forms |
|----------------------|------------------------------------------------|-------------|---------------------------------------------------------------|
| 1039-1               | 1177 // 1175                                   | B1b1        | present                                                       |
| 1039-2               | 1177 // 1175                                   | B1b1        | present                                                       |
| 1039-3               | 1177 // 1175                                   | B1b1        | present                                                       |
| 1039-4               | 1177 // 1175                                   | B1b1        | present                                                       |
| 1039-5               | 1177 // 0                                      | <b>B1B1</b> | <b>absent</b>                                                 |
| 1039-6               | 1177 // 0                                      | <b>B1B1</b> | <b>absent</b>                                                 |
| 1039-7               | 1177 // 1175                                   | B1b1        | present                                                       |
| 1039-8               | 1177 // 1175                                   | B1b1        | present                                                       |
| 1039-9               | 1177 // 1175                                   | B1b1        | present                                                       |
| 1039-10              | 1177 // 1175                                   | B1b1        | present                                                       |
| 1039-11              | 1177 // 1175                                   | B1b1        | present                                                       |
| 1039-12              | 1177 // 1175                                   | B1b1        | present                                                       |
| 1039-13              | 1177 // 1175                                   | B1b1        | present                                                       |
| 1039-14              | 1177 // 1175                                   | B1b1        | present                                                       |
| 1039-15              | 1177 // 1175                                   | B1b1        | present                                                       |
| 1039-16              | 1177 // 1175                                   | B1b1        | present                                                       |
| 1044-1               | 1177 // 1175                                   | B1b1        | present                                                       |
| 1044-2               | 1177 // 1175                                   | B1b1        | present                                                       |
| 1044-3               | 1177 // 1175                                   | B1b1        | present                                                       |
| 1044-4               | 1177 // 0                                      | <b>B1B1</b> | <b>absent</b>                                                 |
| 1044-5               | 1177 // 1175                                   | B1b1        | present                                                       |
| 1044-6               | 1177 // 0                                      | <b>B1B1</b> | <b>absent</b>                                                 |
| 1044-7               | 1177 // 1175                                   | B1b1        | present                                                       |
| 1044-8               | 1177 // 1175                                   | B1b1        | present                                                       |
| 1044-9               | 1177 // 0                                      | <b>B1B1</b> | <b>absent</b>                                                 |
| 1044-10              | 1177 // 0                                      | <b>B1B1</b> | <b>absent</b>                                                 |
| 1044-11              | 1177 // 1175                                   | B1b1        | present                                                       |
| 1044-12              | 1177 // 1175                                   | B1b1        | present                                                       |
| 1049-1               | 1177 // 0                                      | <b>B1B1</b> | <b>absent</b>                                                 |
| 1049-2               | 1177 // 0                                      | <b>B1B1</b> | <b>absent</b>                                                 |
| 1049-3               | 1177 // 0                                      | <b>B1B1</b> | <b>absent</b>                                                 |
| 1049-4               | 1177 // 0                                      | <b>B1B1</b> | <b>absent</b>                                                 |
| 1049-5               | 1177 // 1175                                   | B1b1        | present                                                       |
| 1049-6               | 1177 // 0                                      | <b>B1B1</b> | <b>absent</b>                                                 |
| 1049-7               | 1177 // 0                                      | <b>B1B1</b> | <b>absent</b>                                                 |
| 1049-8               | 1177 // 1175                                   | B1b1        | present                                                       |
| 1049-9               | 1177 // 1175                                   | B1b1        | present                                                       |
| 1049-10              | 1177 // 1175                                   | B1b1        | present                                                       |
| 1049-11              | 1177 // 1175                                   | B1b1        | present                                                       |
| 1049-12              | 1177 // 1175                                   | B1b1        | present                                                       |
| 1054-1               | 1177 // 0                                      | <b>B1B1</b> | <b>absent</b>                                                 |
| 1054-2               | 1177 // 1175                                   | B1b1        | present                                                       |
| 1054-3               | 1177 // 1175                                   | B1b1        | present                                                       |
| 1054-4               | 1177 // 1175                                   | B1b1        | present                                                       |
| 1054-5               | 1177 // 1175                                   | B1b1        | present                                                       |

|         |              |             |               |
|---------|--------------|-------------|---------------|
| 1054-6  | 1177 // 1175 | B1b1        | present       |
| 1054-7  | 1177 // 1175 | B1b1        | present       |
| 1054-8  | 1177 // 1175 | B1b1        | present       |
| 1054-9  | 1177 // 1175 | B1b1        | present       |
| 1054-10 | 1177 // 1175 | B1b1        | present       |
| 1054-11 | 1177 // 0    | <b>B1B1</b> | <b>absent</b> |
| 1054-12 | 1177 // 1175 | B1b1        | present       |
| 1054-13 | 1177 // 0    | <b>B1B1</b> | <b>absent</b> |
| 1054-14 | 1177 // 1175 | B1b1        | present       |
| 1055-1  | 1177 // 0    | <b>B1B1</b> | <b>absent</b> |
| 1055-2  | 1177 // 1175 | B1b1        | present       |
| 1055-3  | 1177 // 1175 | B1b1        | present       |
| 1055-4  | 1177 // 1175 | B1b1        | present       |
| 1055-5  | 1177 // 0    | <b>B1B1</b> | <b>absent</b> |
| 1055-6  | 1177 // 1175 | B1b1        | present       |
| 1055-7  | 1177 // 1175 | B1b1        | present       |
| 1055-8  | 1177 // 0    | <b>B1B1</b> | <b>absent</b> |
| 1055-9  | 1177 // 1175 | B1b1        | present       |
| 1055-10 | 1177 // 0    | <b>B1B1</b> | <b>absent</b> |
| 1056-1  | 1177 // 1175 | B1b1        | present       |
| 1056-2  | 1177 // 0    | <b>B1B1</b> | <b>absent</b> |
| 1056-3  | 1177 // 1175 | B1b1        | present       |
| 1056-4  | 1177 // 1175 | B1b1        | present       |
| 1056-5  | 1177 // 0    | <b>B1B1</b> | <b>absent</b> |
| 1056-6  | 1177 // 1175 | B1b1        | present       |
| 1056-7  | 1177 // 1175 | B1b1        | present       |
| 1056-8  | 1177 // 0    | <b>B1B1</b> | <b>absent</b> |
| 1056-9  | 1177 // 1175 | B1b1        | present       |
| 1056-10 | 1177 // 1175 | B1b1        | present       |
| 1062-1  | 1177 // 1175 | B1b1        | present       |
| 1062-2  | 1177 // 1175 | B1b1        | present       |
| 1062-3  | 1177 // 1175 | B1b1        | present       |
| 1062-4  | 1177 // 0    | <b>B1B1</b> | <b>absent</b> |
| 1062-5  | 1177 // 0    | <b>B1B1</b> | <b>absent</b> |
| 1062-6  | 1177 // 1175 | B1b1        | present       |
| 1062-7  | 1177 // 1175 | B1b1        | present       |
| 1062-8  | 1177 // 1175 | B1b1        | present       |
| 1062-9  | 1177 // 1175 | B1b1        | present       |
| 1062-10 | 1177 // 1175 | B1b1        | present       |
| 1062-11 | 1177 // 1175 | B1b1        | present       |
| 1062-12 | 1177 // 1175 | B1b1        | present       |
| 1062-13 | 1177 // 0    | <b>B1B1</b> | <b>absent</b> |
| 1062-14 | 1177 // 0    | <b>B1B1</b> | <b>absent</b> |
| 1062-15 | 1177 // 1175 | B1b1        | present       |
| 1062-16 | 1177 // 0    | <b>B1B1</b> | <b>absent</b> |
| 1062-17 | 1177 // 1175 | B1b1        | present       |
