# Supplementary material for: Targeting the B1 Gene and Analysis of Its Polymorphism Associated with Awned/Awnless Trait in Russian Germplasm Collections of Common Wheat
Source: MDPI journal article supplement (doi:10.3390/plants10112285), 2021-10-25
Supplement: s1 [file s1]

**Table S1.** Specific primers for PCR- amplification of different regions of *C2H2Zf* gene.

| Primer pair № | Gene region | Purpose                | Forward and reverse primer sequence (5'→3') | T annealing, °C | PCR program     | Size of PCR product, bp |
|---------------|-------------|------------------------|---------------------------------------------|-----------------|-----------------|-------------------------|
| 1             | Coding      | Sequencing             | Zfcodf:<br>GTTGTGTTGTGACAAGGGCTG            | 58              | Touch-down<br>1 | 438                     |
|               |             |                        | Zfcodr:<br>CTACTGCATGTCCTTAGTGCCT           | 58              |                 |                         |
|               |             |                        |                                             |                 |                 |                         |
| 2             | Promoter    | Sequencing             | Zfpromf1:<br>GACGGGAAGGCACTTAAACC           | 56              | Touch-down<br>1 | 1264/1097**             |
|               |             |                        | Zfpromf2*<br>GGAGGATGAACTTGAGCTAGGGG        | 60              |                 |                         |
|               |             |                        | Zfpromr:<br>ATCGAGCCCCCTCTTCCATCTCC         |                 |                 |                         |
|               |             |                        | Zfpromf3*:<br>GGTTGGTCATATCAACCATGAC        | 55              |                 |                         |
|               |             |                        |                                             |                 |                 |                         |
| 3             | Promoter    | Targeting (B1- allele) | B1for:<br>ATAAACTCCCACATAATTACTTCG          | 52              | Touch-down<br>2 | 1177                    |
|               |             |                        | Znfrev:<br>CTCTTCCATCTCCATGCCCA             | 57              |                 |                         |
|               |             |                        |                                             |                 |                 |                         |
| 4             | Promoter    | Targeting (b1-allele)  | b1for:<br>AAACTCCCACATAATTACTCCC            | 53              | Touch-down<br>2 | 1175                    |
|               |             |                        | Znfrev:<br>CTCTTCCATCTCCATGCCCA             | 57              |                 |                         |
|               |             |                        |                                             |                 |                 |                         |

\*- Additional primers for sequencing; \*\*-PCR product in case of combination Zfpromf2/Zfpromr
